# Supplementary material
Source: PubMed Central journal article supplement (PMC1559948)
Supplement: rspb20053213s01.pdf [file rspb20053213s01.pdf]

# ELECTRONIC APPENDIX

This is the Electronic Appendix to the article

Behavioural manipulation in a grasshopper harbouring hairworm: a proteomics approach

by

D. G. Biron, L. Marché, F. Ponton, H. D. Loxdale, N. Galéottia, L. Renault, C. Joly & F. Thomas

*Proc. R. Soc. B* ([doi:10.1098/rspb.2005.3213](https://doi.org/10.1098/rspb.2005.3213))

Electronic appendices are refereed with the text; however, no attempt is made to impose a uniform editorial style on the electronic appendices.

**Table 4: Identification of proteins showing a differential expression in the grasshopper CNS and in the hairworm during the observation of the abnormal behaviour of the host.**

| Localization                | Protein Spot Identity | Protein name (Find in SwissProt (#) and TrEMBL(*))          | Accession Number | Family of protein         | Exp. pI_Mw | Theo. pI_Mw             | Known Function                                                                                                                                                                                                                                                                                                                                                                                                                                                                                                                                                                                    |
|-----------------------------|-----------------------|-------------------------------------------------------------|------------------|---------------------------|------------|-------------------------|---------------------------------------------------------------------------------------------------------------------------------------------------------------------------------------------------------------------------------------------------------------------------------------------------------------------------------------------------------------------------------------------------------------------------------------------------------------------------------------------------------------------------------------------------------------------------------------------------|
| <i>In grasshopper's CNS</i> | hA                    | Act2 (#)                                                    | P07837           | Actin; 1                  | 5.13_45.8  | 5.29_41.6               | Actins are highly conserved proteins that are involved in various types of cell motility and are ubiquitously expressed in all eukaryotic cells. Multiple isoforms are involved in various cellular functions such as cytoskeleton structure, cell mobility, chromosome movement and muscle contraction.                                                                                                                                                                                                                                                                                          |
|                             | hB                    | Alpha-tubulin (#)                                           | Q8T8B5           | Tubulin; 1                | 4.98_60.9  | 4.97_50.1               | This family includes the tubulin alpha, beta and gamma chains, as well as the bacterial FtsZ family of proteins. Members of this family are involved in polymer formation. FtsZ is the polymer-forming protein of bacterial cell division. It is part of a ring in the middle of the dividing cell that is required for constriction of cell membrane and cell envelope to yield two daughter cells. FtsZ and tubulin are GTPases. FtsZ can polymerise into tubes, sheets, and rings <i>in vitro</i> and is ubiquitous in eubacteria and archaea. Tubulin is the major component of microtubules. |
|                             | hC                    | CG31732-PD, isoform D (*)                                   | Q8IP47           | Unknown                   | 5.00_60.3  | 5.25_63.8               | Implied in biological process of geotactic behaviour (gravitactic behaviour: the orientated locomotion of an organism in response to gravity).                                                                                                                                                                                                                                                                                                                                                                                                                                                    |
|                             | hD                    | Hunchback protein (#)                                       | Q01791           | zf-C2H2; 6                | 5.04_61.0  | 6.20_59.5               | Gap class segmentation protein that controls development of head structures.                                                                                                                                                                                                                                                                                                                                                                                                                                                                                                                      |
|                             | hE                    | Moosin/ezrin/radixin homolog 1 (#)                          | P46150           | Band_41; 1                | 5.27_52.9  | 5.60_60.5               | In embryonic CNS, expression is seen in the neuropil, developing brain and neuronal cell bodies. Involved in connections of major cytoskeletal structures to the plasma membrane.                                                                                                                                                                                                                                                                                                                                                                                                                 |
|                             | hF                    | Flotillin-2 (#)                                             | O61492           | Band_7; 1<br>Flotillin; 1 | 5.95_45.6  | 5.70_46.6               | May play a role in axon growth and regeneration as well as in epidermal cell adhesion and epidermal structure and function. Biological process: cell adhesion                                                                                                                                                                                                                                                                                                                                                                                                                                     |
|                             | hG                    | CG8863-PA, isoform A (*)                                    | Q9V9V9           | DnaJ; 1                   | 5.97_49.2  | 6.08_45.2               | Reactions triggered in response to the presence of a foreign body or the occurrence of an injury, which result in restriction of damage to the organism attacked or prevention/recovery from the infection caused by the attack. Also, a change in state or activity of an organism or cell (in terms of movement, secretion, enzyme production, gene expression, etc.) that occurs in response to stress, usually, but not necessarily exogenous (e.g. temperature, humidity, ionizing radiation).                                                                                               |
|                             | hH                    | Neural/ectodermal development factor IMP-L2 [Precursor] (#) | Q09024           | Ig; 2                     | 5.13_34.1  | 5.7_29.4                | Essential developmental role during embryogenesis, in particular the normal development of the nervous system. May be involved in some aspect of cell adhesion.                                                                                                                                                                                                                                                                                                                                                                                                                                   |
|                             | hI                    | Wingless [Fragment] (*)                                     | Q27671           | Wnt; 1                    | 4.81_31.0  | Undefined;<br>Undefined | It is thought to play a role in intercellular communication and seems to be a signaling                                                                                                                                                                                                                                                                                                                                                                                                                                                                                                           |

|    |                                                                                                                                                                                                                                                                                                                                                                                                                        |        |                       |           |                      |                                                                                                                                                                                                                                                                                                                                                                                                                                                                                                             |
|----|------------------------------------------------------------------------------------------------------------------------------------------------------------------------------------------------------------------------------------------------------------------------------------------------------------------------------------------------------------------------------------------------------------------------|--------|-----------------------|-----------|----------------------|-------------------------------------------------------------------------------------------------------------------------------------------------------------------------------------------------------------------------------------------------------------------------------------------------------------------------------------------------------------------------------------------------------------------------------------------------------------------------------------------------------------|
|    | molecule important in the development of the central nervous system (CNS). The sequence of wnt-1 is highly conserved in mammals, fish, and amphibians. Wnt-1 is a member of a large family of related proteins that are all thought to be developmental regulators. These proteins are known as wnt-2 (also known as irp), wnt-3 up to wnt-15. At least four members of this family are present in <i>Drosophila</i> . |        |                       |           |                      |                                                                                                                                                                                                                                                                                                                                                                                                                                                                                                             |
| hJ | Synaptosome-associated protein SNAP-25-1 (*)                                                                                                                                                                                                                                                                                                                                                                           | O96574 | SNAP-25; 1. SNARE; 1. | 5.14_30.1 | 4.43_22.0            | Biological process: endocytosis and exocytosis in CNS.                                                                                                                                                                                                                                                                                                                                                                                                                                                      |
| hK | Wingless [Fragment]                                                                                                                                                                                                                                                                                                                                                                                                    | O46295 | wnt; 1                | 5.67_22.3 | Undefined; Undefined | Wnt-1 (previously known as int-1) is a proto-oncogene induced by the integration of the mouse mammary tumor virus. It is thought to play a role in intercellular communication and seems to be a signaling molecule important in the development of the central nervous system (CNS).                                                                                                                                                                                                                       |
| hL | Similar to <i>Drosophila</i> melanogaster qm [Fragment] (*)                                                                                                                                                                                                                                                                                                                                                            | Q6XIN5 | Ribosomal_L10e; 1     | 5.86_23.5 | Undefined; Undefined | Biological process: protein biosynthesis.                                                                                                                                                                                                                                                                                                                                                                                                                                                                   |
| hM | Unknown                                                                                                                                                                                                                                                                                                                                                                                                                |        |                       | 4.99_30.3 |                      | Unknown                                                                                                                                                                                                                                                                                                                                                                                                                                                                                                     |
| hN | Unknown                                                                                                                                                                                                                                                                                                                                                                                                                |        |                       | 5.38_37.7 |                      | Unknown                                                                                                                                                                                                                                                                                                                                                                                                                                                                                                     |
| hO | Unknown                                                                                                                                                                                                                                                                                                                                                                                                                |        |                       | 5.45_29.1 |                      | Unknown                                                                                                                                                                                                                                                                                                                                                                                                                                                                                                     |
| hP | Unknown                                                                                                                                                                                                                                                                                                                                                                                                                |        |                       | 5.50_30.8 |                      | Unknown                                                                                                                                                                                                                                                                                                                                                                                                                                                                                                     |
| hQ | Unknown                                                                                                                                                                                                                                                                                                                                                                                                                |        |                       | 5.65_31.0 |                      | Unknown                                                                                                                                                                                                                                                                                                                                                                                                                                                                                                     |
| hR | Unknown                                                                                                                                                                                                                                                                                                                                                                                                                |        |                       | 5.83_33.1 |                      | Unknown                                                                                                                                                                                                                                                                                                                                                                                                                                                                                                     |
| pA | Actin (#)                                                                                                                                                                                                                                                                                                                                                                                                              | P90689 | Actin; 1              | 5.13_45.8 | 5.3_41.7             | As with Act2 (#) above                                                                                                                                                                                                                                                                                                                                                                                                                                                                                      |
| pB | Hypothetical protein Y49E10.23a (*)                                                                                                                                                                                                                                                                                                                                                                                    | Q9XTT2 | CARD; 1               | 4.94_73.2 | 5.27_84.7            | Biological process: regulation of apoptosis.                                                                                                                                                                                                                                                                                                                                                                                                                                                                |
| pC | Hypothetical protein C47D12.6b (*)                                                                                                                                                                                                                                                                                                                                                                                     | Q86D21 | HGTP_anticondon; 1    | 5.21_69.1 | 6.43_79.5            | Biological process: protein biosynthesis.                                                                                                                                                                                                                                                                                                                                                                                                                                                                   |
| pD | Heat shock protein 60 (*)                                                                                                                                                                                                                                                                                                                                                                                              | Q8MZM9 | Cpn60_TCP1; 1         | 5.06_60.6 | 6.55_62.3            | Molecular function: unfolded protein binding.                                                                                                                                                                                                                                                                                                                                                                                                                                                               |
| pE | Tyrosine 3-monooxygenase (#)                                                                                                                                                                                                                                                                                                                                                                                           | P90986 | Biopterin_H; 1        | 5.63_63.6 | 6.2_59.6             | Biological process: aromatic amino acid family metabolism                                                                                                                                                                                                                                                                                                                                                                                                                                                   |
| pF | Unknown                                                                                                                                                                                                                                                                                                                                                                                                                |        |                       | 5.90_58.3 |                      | Unknown                                                                                                                                                                                                                                                                                                                                                                                                                                                                                                     |
| pG | Putative acetylcholine regulator unc-18 (#)                                                                                                                                                                                                                                                                                                                                                                            | P34815 | Sec1; 1               | 5.91_60.0 | 6.50_67.4            | Sec1-like molecules have been implicated in a variety of eukaryotic vesicle transport processes including neurotransmitter release by exocytosis. They regulate vesicle transport by binding to t-SNARE, from the syntaxin family. This process is thought to prevent SNARE complex formation, a protein complex required for membrane fusion. Whereas Sec1 molecules are essential for neurotransmitter release and other secretory events, their interaction with syntaxin molecules seems to represent a |

|    |                                                         |        |                          |           |                      |                                                                                                                                                                                                                                                                                                                                                                                                                                                                                                                                                                                                                                       |
|----|---------------------------------------------------------|--------|--------------------------|-----------|----------------------|---------------------------------------------------------------------------------------------------------------------------------------------------------------------------------------------------------------------------------------------------------------------------------------------------------------------------------------------------------------------------------------------------------------------------------------------------------------------------------------------------------------------------------------------------------------------------------------------------------------------------------------|
|    | negative regulatory step in secretion.                  |        |                          |           |                      |                                                                                                                                                                                                                                                                                                                                                                                                                                                                                                                                                                                                                                       |
| pH | Intermediate filament protein [Fragment] (*)            | Q17092 | Filament; 1.             | 5.96_58.6 | Undefined; Undefined | Molecular function: structural molecule activity. Intermediate filaments are proteins which are primordial components of the cytoskeleton and the nuclear envelope. They generally form filamentous structures 8 to 14 nm wide.                                                                                                                                                                                                                                                                                                                                                                                                       |
| pI | Beta-tubulin (*)                                        | Q66T51 | Tubulin; 1; Tubulin_C; 1 | 5.62_52.4 | 4.70_50.2            | See spot pE                                                                                                                                                                                                                                                                                                                                                                                                                                                                                                                                                                                                                           |
| pJ | Unknown                                                 |        |                          | 5.61_50.8 |                      | Unknown                                                                                                                                                                                                                                                                                                                                                                                                                                                                                                                                                                                                                               |
| pK | Guanine nucleotide-binding protein alpha-16 subunit (#) | Q9N2V6 | G-alpha; 1               | 5.63_50.7 | 5.32_412             | Guanine nucleotide-binding proteins (G proteins) are involved as modulators or transducers in various trans-membrane signaling systems.                                                                                                                                                                                                                                                                                                                                                                                                                                                                                               |
| pL | Bestrophin 1 (#)                                        | Q21973 | Bestrophin; 1            | 5.59_49.8 | 6.01_60.5            | Molecular function unknown                                                                                                                                                                                                                                                                                                                                                                                                                                                                                                                                                                                                            |
| pM | Arginine kinase (*)                                     | Q9NKV4 | ATP-gua_Ptrans; 1        | 5.61_48.8 | 6.28_39.1            | Molecular function: transferase activity, transferring phosphorus-containing groups. It catalyzes the reversible transfer of high energy phosphate from ATP to creatine, generating phosphocreatine and ADP. There are at least four different, but very closely related, forms of CK. Two isozymes, M (muscle) and B (brain), are cytosolic, whilst the other two are mitochondrial. In sea urchins there is a flagellar isozyme, which consists of the triplication of a CK-domain. A cysteine residue is implicated in the catalytic activity of these enzymes and the region around this active site residue is highly conserved. |
| pN | Unknown                                                 |        |                          | 5.62_48.1 |                      | Unknown                                                                                                                                                                                                                                                                                                                                                                                                                                                                                                                                                                                                                               |
| pO | Hypothetical protein CBG14575 (*)                       | Q618N4 | Unknown                  | 5.85_50.7 | 6.19_45.8            | Unknown                                                                                                                                                                                                                                                                                                                                                                                                                                                                                                                                                                                                                               |
| pP | Heat shock protein 60 (*)                               | Q8MZM9 | Cpn60_TCP1; 1            | 6.00_48.8 | 6.55_62.3            | Molecular function: unfolded protein binding.                                                                                                                                                                                                                                                                                                                                                                                                                                                                                                                                                                                         |
| pQ | Wnt5_DROSO(*)                                           | P28466 | Wnt; 1                   | 5.49_38.5 | Undefined; Undefined | See spot hI                                                                                                                                                                                                                                                                                                                                                                                                                                                                                                                                                                                                                           |
| pR | Hypothetical protein CBG08254 [Fragment] (*)            | Q61N05 | Unknown                  | 4.93_34.8 | Undefined; Undefined | Unknown                                                                                                                                                                                                                                                                                                                                                                                                                                                                                                                                                                                                                               |
| pS | DNA binding protein [Fragment] (*)                      | Q08128 | zf-C2H2; 8               | 5.18_31.9 | Undefined; Undefined | Molecular function: zinc ion binding.                                                                                                                                                                                                                                                                                                                                                                                                                                                                                                                                                                                                 |
| pT | Troponin t protein 4, isoform b (*)                     | Q86S43 | Troponin; 1              | 5.54_32.4 | 5.05_36.2            | The troponin (Tn) complex regulates Ca <sup>2+</sup> -induced muscle contraction.. This family forms structural complexes with other P1am families.                                                                                                                                                                                                                                                                                                                                                                                                                                                                                   |
| pU | Probable deoxyhypusine synthase (#)                     | Q9XXJ0 | DS; 1                    | 5.85_33.6 | 5.50_40.5            | Catalyzes the NAD-dependent oxidative cleavage of spermidine and the subsequent transfer of the butylamine moiety of spermidine to the epsilon-amino group of a specific lysine residue of the eIF-5A precursor protein to form the intermediate deoxyhypusine residue.                                                                                                                                                                                                                                                                                                                                                               |
| pV | NOA36-like protein (*)                                  | Q8WQH6 | NOA36; 1                 | 5.85_32.9 | 7.60_36.6            | This family consists of several NOA36 proteins which contain 29 highly conserved cysteine residues. The function of this protein is unknown.                                                                                                                                                                                                                                                                                                                                                                                                                                                                                          |
| pX | Unknown                                                 |        |                          | 4.98_29.2 |                      | Unknown                                                                                                                                                                                                                                                                                                                                                                                                                                                                                                                                                                                                                               |

|     |                                              |        |                |           |                         |                                                                                                                                                                                                                                                                                       |
|-----|----------------------------------------------|--------|----------------|-----------|-------------------------|---------------------------------------------------------------------------------------------------------------------------------------------------------------------------------------------------------------------------------------------------------------------------------------|
| pY  | Wnt4_DROME (*)                               | P40589 | wnt; 1         | 5.04_27.4 | Undefined;<br>Undefined | Wnt-1 (previously known as int-1) is a proto-oncogene induced by the integration of the mouse mammary tumor virus. It is thought to play a role in intercellular communication and seems to be a signaling molecule important in the development of the central nervous system (CNS). |
| pZ  | Hypothetical protein<br>C54D10.10            | Q18836 | Kunitz_BPTI; 2 | 5.41_24.5 | 5.99_25.9               | Molecular function: serine-type endopeptidase inhibitor activity                                                                                                                                                                                                                      |
| pA1 | Binding protein 2 like protein<br>[Fragment] | Q7Z288 | FKBP_C; 1.     | 5.88_31.0 | Undefined;<br>Undefined | Biological process: protein folding                                                                                                                                                                                                                                                   |
| pB1 | Hypothetical protein<br>CBG15114 [Fragment]  | Q616W4 | Unknown        | 5.97_27.6 | Undefined;<br>Undefined | Unknown                                                                                                                                                                                                                                                                               |
